# Supplementary material
Source: PubMed Central journal article supplement (PMC8745232)
Supplement: i1537-2073-23-6-269_s01.pdf [file i1537-2073-23-6-269_s01.pdf]

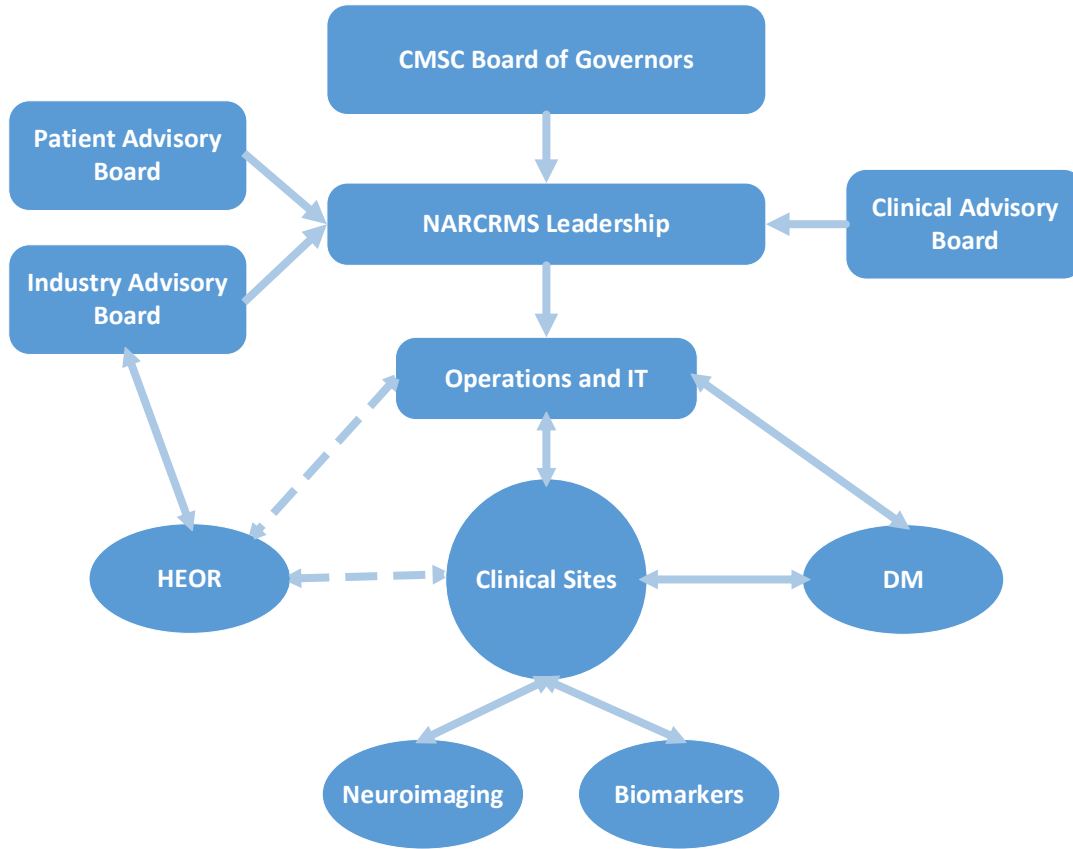

**Figure S1. The NARCRMS organizational structure**

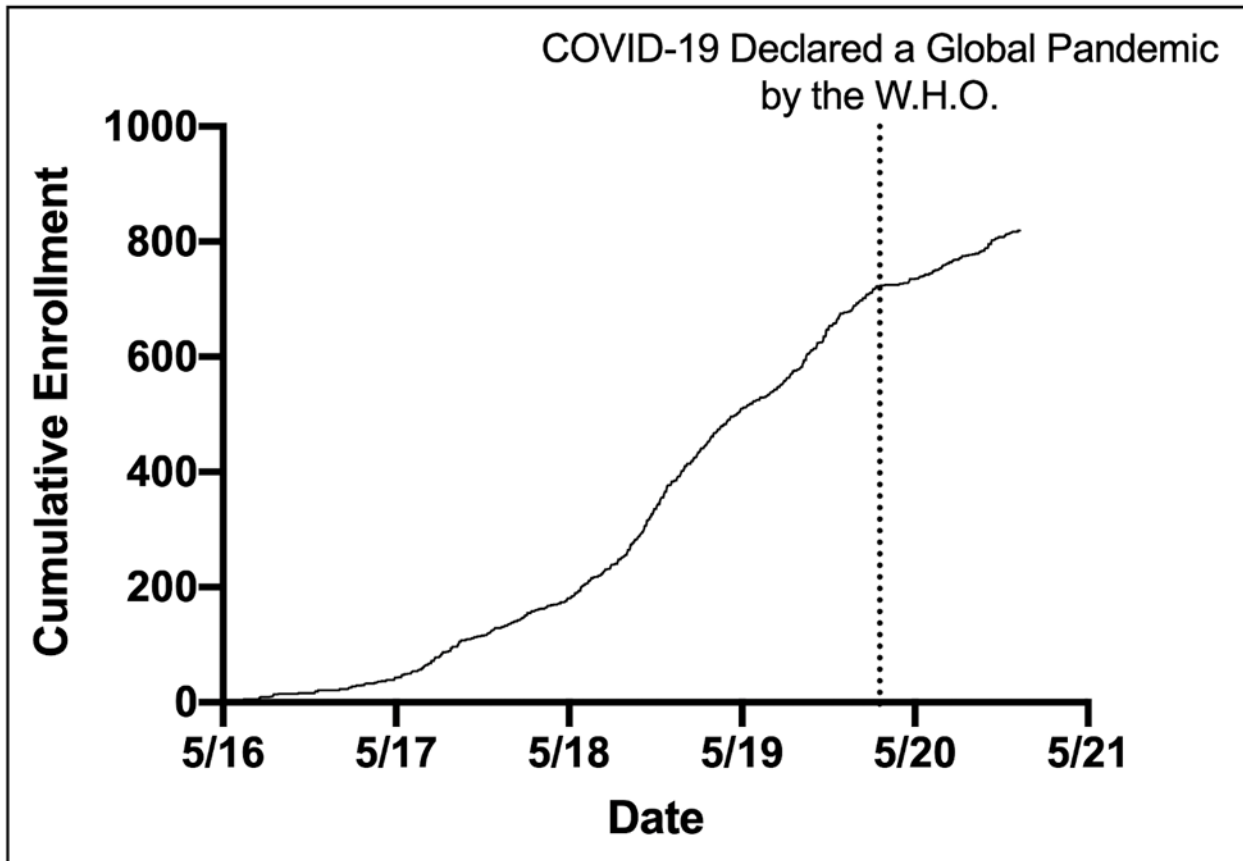

**Figure S2. NARCRMS cumulative enrollment as of January 2021 (n = 819)**

The dashed vertical line denotes the declaration of COVID-19 a global pandemic on March 11th, 2020 by the World Health Organization (W.H.O.). This event corresponded to only a modest deceleration in NARCRMS enrollment.

**Appendix S1. Clinical advisory board roster**

| <b>Name</b>        | <b>Institution</b>                                                          | <b>Steering Committee Role</b>               |
|--------------------|-----------------------------------------------------------------------------|----------------------------------------------|
| Bebo, Bruce        | NMSS                                                                        | Member; MS Organization                      |
| Berger, Joseph     | University of Pennsylvania                                                  | Member; Site PI                              |
| Bove, Riley        | UCSF                                                                        | Member; MS Organization                      |
| Campagnolo, Denise | Biogen                                                                      | <i>Ex officio</i> Member; NARCRMS IAB Chair  |
| Chitnis, Tanuja    | Brigham and Women's Hospital<br>Massachusetts General Hospital for Children | Member; Non-PI MS Expert                     |
| Cohan, Stanley     | Providence MS Center                                                        | Member; Site PI                              |
| Ford, Corey        | University of New Mexico                                                    | Member; Site PI                              |
| Fox, Bob           | NARCOMS                                                                     | Member; MS Organization                      |
| Goodman, Andrew    | University of Rochester Medical Center                                      | Member; Non-PI MS Expert                     |
| Gupta, Ajay        | Fort Wayne Neurological Center                                              | Member; Site PI                              |
| Halper, June       | Consortium of MS Centers                                                    | <i>Ex officio</i> Member; CEO CMSC           |
| Li, David          | University of British Columbia                                              | <i>Ex officio</i> Member; Associate Director |
| Montalban, Xavier  | University of Toronto; MS Center at St. Michael's Hospital                  | Member; Non-PI MS Expert                     |
| Moore, Marie       | NARCRMS PAB                                                                 | Member; Non-PI MS Expert                     |
| Murdoch, Gina      | MSAA                                                                        | Member; MS Organization                      |
| Racke, Michael     | CMSC                                                                        | <i>Ex officio</i> Member; CMSC President     |
| Rammohan, Kottil   | University of Miami                                                         | <i>Ex officio</i> Member; NARCRMS Director   |
| Repovic, Pavle     | Swedish Hospital Center                                                     | Member: Site PI                              |
| Rivera, Victor     | Baylor College of Medicine                                                  | Member; Non-PI MS Expert                     |
| Wallin, Mitchell   | U.S. Department of Veterans Affairs                                         | Member; MS Organization                      |

## **Appendix S2. Presentations that were derived from NARCRMS**

### **2020:**

Rammohan, Kottil, Li, David, Halper, June, Murphy, Sara McCurdy, Wallace, Trent, Patton, Lisa, Chrisant, Sarah, Zheng, Chao, Khurana, Seema. Motor Impairment in Multiple Sclerosis: Analysis from the North American Registry for Care and Research in Multiple Sclerosis (NARCRMS) [abstract].

Proceedings of the 2020 CMSC Virtual Annual Meeting; 2020 May 26 – 29

### **2019:**

Rammohan, Kottil, Li, David, Halper, June, Murphy, Sara McCurdy, Patton, Lisa, Chrisant, Sarah, Berger, Joseph, Carlson, Aaron, China, Angel, Cohan, Stanley, Cohen, Bruce, Cross, Anne, Dunn, Jeffrey, Ford, Corey, Fox, Edward, Gupta, Ajay, Harel, Asaff, Kamin, Stephen, Levin, Michael, Mao-Draayer, Yang, Mayer, Lori, Repovic, Pavle, Ruiz, Jennifer, Rus, Horea, Samudralwar, Rohini, Subei, Adnan, Thomas, Florian, Vicente, Ivonne. The North American Registry for Care and Research in MS (NARCRMS) [abstract]. 35<sup>th</sup> Congress of the European Committee for Treatment and Research in MS (ECTRIMS); 2019 Sept 11 – 13; Stockholm, Sweden

Livingston, Terrie, Mao-Draayer, Yang, Rammohan, Kottil, Li, David, Halper, June, Murphy, Sara McCurdy, Patton, Lisa and the NARCRMS Healthcare Economics Outcomes Research Advisory Group. The Economic Impact of Multiple Sclerosis: A preliminary look at the North American Registry for Care and Research in Multiple Sclerosis (NARCRMS) [abstract]. Proceedings of the 2019 CMSC Annual Meeting; 2019 May 28 – June 1; Seattle, WA

Chinea, Angel, Rammohan, Kottil, Li, David, Halper, June, Murphy, Sara McCurdy, Patton, Lisa, Chrisant, Sarah, Berger, Joseph, Carlson, Aaron, Cohan, Stanley, Cohen, Bruce, Cross, Anne, Dunn, Jeffrey, Ford, Corey, Fox, Edward, Gupta, Ajay, Harel, Asaff, Kamin, Stephen, Levin, Michael, Mao-Draayer, Yang, Mayer, Lori, Repovic, Pavle, Ruiz, Jennifer, Rus, Horea, Samudralwar, Rohini, Subei, Adnan, Thomas, Florian. The North American Registry for Care and Research in MS (NARCRMS) [abstract]. Proceedings of the 2019 CMSC Annual Meeting; 2019 May 28 – June 1; Seattle, WA

Livingston, Terrie, Mao-Draayer, Yang, Rammohan, Kottil, Li, David, Halper, June, Murphy, Sara McCurdy, Patton, Lisa. The Economic Impact of Multiple Sclerosis: A Preliminary Look at the North American Registry for Care and Research in MS (NARCRMS) [abstract]. Proceedings of the 71<sup>st</sup> AAN Annual Meeting; 2019 May 4 – 10; Philadelphia, PA

Rammohan, Kottil, Li, David, Halper, June, Murphy, Sara McCurdy, Patton, Lisa, Berger, Joseph, Carlson, Aaron, Chinea, Angel, Cohan, Stanley, Cohen, Bruce, Cross, Anne, Dunn, Jeffrey, Ford, Corey, Fox, Edward, Gupta, Ajay, Kamin, Stephen, Levin, Michael, Mao-Draayer, Yang, Mayer, Lori, Repovic, Pavle, Ruiz, Jennifer, Rus, Horea, Samudralwar, Subei, Adnan, Thomas, Florian. The North American Registry for Care and Research in MS (NARCRMS) [abstract]. Proceedings of the 71<sup>st</sup> AAN Annual Meeting; 2019 May 4 – 10; Philadelphia, PA

Rammohan, Kottil, Li, David, Halper, June, Murphy, Sara McCurdy, Patton, Lisa, Livingston, Terrie. The Economic Impact of Multiple Sclerosis: A Preliminary Look at the North American Registry for Care and

Research in MS (NARCRMS) [abstract]. Proceedings of the ACTRIMS Forum 2019; 2019 Feb 28 – Mar 2; Dallas, TX.

Rammohan, Kottil, Li, David, Halper, June, Murphy, Sara McCurdy, Patton, Lisa, Berger, Joseph, Carlson, Aaron, China, Angel, Cohan, Stanley, Cross, Anne, Dunn, Jeffrey, Fox, Edward, Gupta, Ajay, Kamin, Stephen, Mao-Draayer, Yang, Mayer, Lori, Repovic, Pavle, Ruiz, Jennifer, Rus, Horea, Samudralwar, Rohini, Subei, Adnan, Thomas, Florian. The North American Registry for Care and Research in MS (NARCRMS) [abstract]. Proceedings of the ACTRIMS Forum 2019; 2019 Feb 28 – Mar 2; Dallas, TX.

**2018:**

Rammohan, Kottil, Cross, Anne, Jones, David, Halper, June, Murphy, Sara McCurdy, Patton, Lisa, Fox, Edward, Mayer, Lori, Racke, Michael. The North American Registry for Care and Research in MS (NARCRMS) [abstract]. Proceedings of the 2018 CMSC Annual Meeting; 2018 May 30 – June 2; Nashville, TN

Rammohan, Kottil, Cross, Anne, Jones, David, Halper, June, Murphy, Sara McCurdy, Patton, Lisa, Fox, Edward, Mayer, Lori, Racke, Michael. The North American Registry for Care and Research in MS (NARCRMS) [abstract]. Proceedings of the 70th AAN Annual Meeting; 2018 Apr 21 – 27; Los Angeles, CA

Jones, David, Halper, June, Patton, Lisa, Murphy, Sara McCurdy, Rammohan, Kottil. Overview of the North American Registry for Care and Research in MS (NARCRMS) [abstract]. Proceedings of the 70th Annual AAN Annual Meeting; 2018 Apr 21 – 27; Los Angeles, CA

Cross, Anne, Rammohan, Kottil, Jones, David, Halper, June, Murphy, Sara McCurdy, Patton, Lisa, Fox, Edward, Mayer, Lori, Racke, Michael. The North American Registry for Care and Research in MS (NARCRMS) [abstract]. Proceedings of the ACTRIMS Forum 2018; 2018 Feb 1 – 3; San Diego, CA

Rammohan, Kottil, Halper, June, Murphy, Sara McCurdy, Patton, Lisa, Jones, David. Overview of the North American Registry for Care and Research in MS (NARCRMS) [abstract]. Proceedings of the ACTRIMS Forum 2018; 2018 Feb 1 – 3; San Diego, CA
